# Supplementary material
Source: PubMed Central journal article supplement (PMC4424326)
Supplement: supp_M114.627653_jbc.M114.627653-1.pdf [file supp_M114.627653_jbc.M114.627653-1.pdf]

## Supplemental Information

Genetic Deficiency of *Mtdh* in Mice Causes Male Infertility via Impaired Spermatogenesis and Alterations in the Expression of Small Non-coding RNAs

**Xiangbing Meng, Shujie Yang, Yuping Zhang, Xinjun Wang, Renee X. Goodfellow, Yichen Jia, Kristina W. Thiel, Henry D. Reyes, Baoli Yang, and Kimberly K. Leslie**

WT

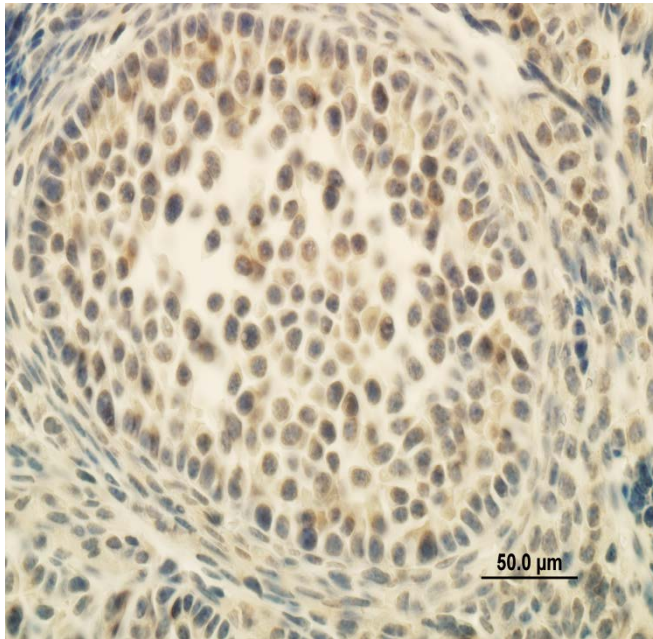

*Mtdh*<sup>-/-</sup>

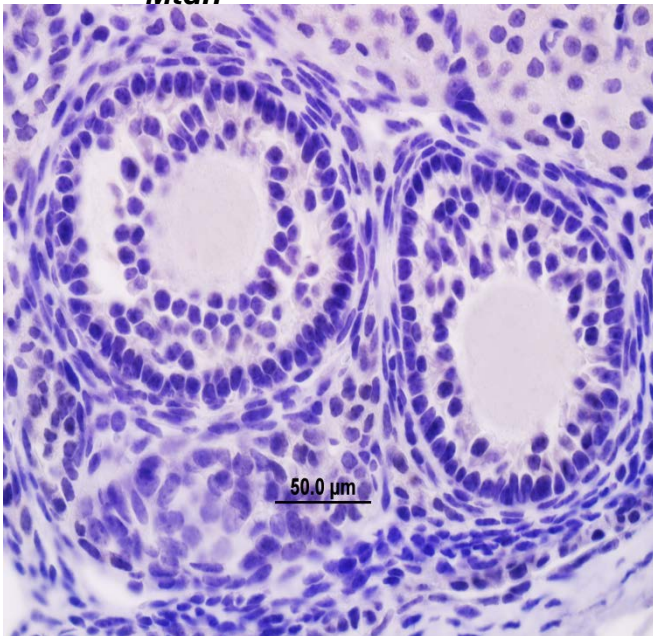

Figure S1. Expression of Mtdh in ovaries from WT but not *Mtdh* exon 3-deficient mice.

**Table S1A.** Genotypes of the litters generated by breeding *Mtdh*<sup>+/-</sup> male and *Mtdh*<sup>+/-</sup> female mice.

| Litter       | Number of mice (% of total) |                            |                            |            |
|--------------|-----------------------------|----------------------------|----------------------------|------------|
|              | <i>Mtdh</i> <sup>+/-</sup>  | <i>Mtdh</i> <sup>-/-</sup> | <i>Mtdh</i> <sup>+/+</sup> | Total      |
| #8486        | 3 (33%)                     | 0                          | 6(66%)                     | 9          |
| #8487        | 3 (42.9%)                   | 0                          | 4(57.1%)                   | 7          |
| #8529        | 2 (33%)                     | 0                          | 4(66%)                     | 6          |
| #8539        | 3 (33%)                     | 0                          | 6(66%)                     | 9          |
| #8540        | 4 (80%)                     | 0                          | 1(20%)                     | 5          |
| #8593        | 1 (20%)                     | 1(20%)                     | 3(60%)                     | 5          |
| #8600        | 2 (22%)                     | 0                          | 7(78%)                     | 9          |
| #8612        | 2 (33%)                     | 0                          | 4(66%)                     | 6          |
| #8642        | 2 (33%)                     | 1(16.6%)                   | 3(50%)                     | 6          |
| #8650        | 2 (25%)                     | 1(12.5%)                   | 5(62.5%)                   | 8          |
| #8664        | 2 (33%)                     | 0                          | 4(66%)                     | 6          |
| #8667        | 5 (83.3%)                   | 0                          | 1(16.7%)                   | 6          |
| #8677        | 1(14.3%)                    | 1(14.3%)                   | 5(71.4%)                   | 7          |
| #8695        | 2(40%)                      | 1(20%)                     | 2(40%)                     | 5          |
| #8697        | 3(50%)                      | 1(16.7%)                   | 2(33.3%)                   | 6          |
| #8704        | 2(66.7%)                    | 0                          | 1(33.3%)                   | 3          |
| #8718        | 3(50%)                      | 1(16.7%)                   | 2(33.3%)                   | 6          |
| #8724        | 4(50%)                      | 1(12.5%)                   | 3(37.5%)                   | 7          |
| #8736        | 2(66.7%)                    | 0                          | 1(33.3%)                   | 3          |
| #8763        | 2(50%)                      | 0                          | 2(50%)                     | 4          |
| #8764        | 3(60%)                      | 0                          | 2(40%)                     | 5          |
| #8768        | 5(71.4%)                    | 0                          | 2(28.6%)                   | 7          |
| #8782        | 2 (33.3%)                   | 0                          | 4(66.7%)                   | 6          |
| #8783        | 2(22.2%)                    | 1(11.1%)                   | 6(66.7%)                   | 9          |
| <b>Total</b> | <b>62 (41.3%)</b>           | <b>9 (6%)</b>              | <b>79 (52.7%)</b>          | <b>150</b> |

**Table S1B.** No litters were generated from crossing *Mtdh*<sup>-/-</sup> male mice with *Mtdh*<sup>+/-</sup> female mice.

| <i>Mtdh</i> <sup>-/-</sup> (male) | Number of litters |
|-----------------------------------|-------------------|
| #8562-4                           | 0                 |
| #8677-4                           | 0                 |
| #8695-1                           | 0                 |
| #8697-5                           | 0                 |
| #21596-1                          | 0                 |
| #21598-4                          | 0                 |
| #21599-3                          | 0                 |
| #21607-5                          | 0                 |
| #21609-1                          | 0                 |
| #21348-1                          | 0                 |
| #21315-4                          | 0                 |
| #21537-1                          | 0                 |
| <b>Total</b>                      | <b>0</b>          |

**Table S1C.** Genotypes of the litters generated from crossing *Mtdh*<sup>-/-</sup> female mice with *Mtdh*<sup>+/-</sup> male mice.

| Litter       | Number of mice             |                            |           |
|--------------|----------------------------|----------------------------|-----------|
|              | <i>Mtdh</i> <sup>+/-</sup> | <i>Mtdh</i> <sup>-/-</sup> | Total     |
| #8599        | 4 (100%)                   | 0                          | 4         |
| #8619        | 4 (100%)                   | 0                          | 4         |
| #8698        | 4 (66.7%)                  | 2(33.3%)                   | 6         |
| #8749        | 3 (100%)                   | 0                          | 3         |
| #8786        | 3 (100%)                   | 0                          | 3         |
| #8797        | 1 (100%)                   | 0                          | 1         |
| <b>Total</b> | <b>19(90.5%)</b>           | <b>2 (9.5%)</b>            | <b>21</b> |

**Table S2: Effect of deficiency of *Mtdh* on miRNA expression in liver.** Five microRNAs down-regulated in *Mtdh*-deficient testes were examined in the liver using the TaqMAN® microRNA RT-qPCR kit from Applied Biosystems (\*p<0.05, \*\*p<0.01).

| miRNA           | Average $\Delta$ Ct        |        | <i>Mtdh</i> <sup>-/-</sup> vs. WT |          |
|-----------------|----------------------------|--------|-----------------------------------|----------|
|                 | <i>Mtdh</i> <sup>-/-</sup> | WT     | Fold Change                       | P-value  |
| mmu-miR-101b-3p | 0.949                      | 1.338  | 1.309                             | 0.0005** |
| mmu-miR-16-2-3p | 10.318                     | 10.998 | 1.602                             | 0.4050   |
| mmu-miR-182-5p  | 8.805                      | 9.449  | 1.562                             | 0.1865   |
| mmu-miR-19b-3p  | 1.749                      | 2.449  | 1.624                             | 0.0325*  |
| mmu-miR-340-5p  | 5.891                      | 6.943  | 2.074                             | 0.0001** |
